# Supplementary material for: Issues for DSM-V: DSM-V Should Include a Conceptual Issues Work Group
Source: Atypon-hosted journal article supplement (doi:10.1176/appi.ajp.2007.07091431), 2008-02-01
Supplement: ajp_165_2_174_01.pdf [file ajp_165_2_174_01.pdf]

## Bibliography of DSM Conceptual Issues

- Achenbach TM: DSM-III in light of empirical research on the classification of child psychopathology. *J Am Acad Child Psychiatry* 1980; 19:395-412
- Achenbach TM: Developmental issues in assessment, taxonomy, and diagnosis of child and adolescent psychopathology, in *Developmental Psychopathology: Theory and Methods*. Edited by Chicchetti D, Cohen DJ. New York, John Wiley and Sons, 1995, pp 57-80
- Achenbach TM: Challenges and benefits of assessment, diagnosis, and taxonomy for clinical practice and research. *Aust N Z J Psychiatry* 2001; 35:263-71
- Achenbach TM, Edelbrock CS: The classification of child psychopathology: a review and analysis of empirical efforts. *Psychol Bull* 1978; 85:1275-1301
- Agich GJ: Disease and value: A rejection of the value-neutrality thesis. *Theoretical Medicine* 1983; 4:27-41
- Andreasen NC: The validation of psychiatric diagnosis: new models and approaches. *Am J Psychiatry* 1995; 152:161-162
- Andreasen NC: Improvement of negative symptoms: Concepts, definition, and assessment. *Int Clin Psychopharmacol* 1997; 12 Suppl 2: S7-10.
- Andreasen NC: Schizophrenia: the fundamental questions. *Brain Res Brain Res Rev* 2000; 31: 106-12.
- Andreasen NC: DSM and the death of phenomenology in America: an example of unintended consequences. *Schizophr Bull* 2007; 33: 108-12.
- Ballerini A, Stanghellini G: Phenomenological questions about obsession and delusion. *Psychopathology* 1989; 22:315-319
- Ballerini A, Stanghellini G: Some remarks on dysphoria from an anthropological point of view. *Psychopathology* 1993; 26:189-194
- Bayer R: *Homosexuality and American Psychiatry : The Politics of Diagnosis*. Princeton, NJ, Princeton University Press, 1987
- Bayer R: Politics, science, and the problem of psychiatric nomenclature: A case study of the American Psychiatric Association referendum on homosexuality, in *Scientific Controversies: Case Studies in the Resolution and Closure of Disputes in Science and Technology*. Edited by Engelhardt HT, Caplan A. Cambridge, Cambridge University Press, 1987
- Bayer R, Spitzer RL: Edited correspondence on the status of homosexuality in DSM-III. *J Hist Behav Sci* 1982; 18:32-52
- Bell CC: Racism: a mental illness? *Psychiatr Serv* 2004; 55: 1343
- Berger LS: *Psychotherapy as Praxis: Abandoning Misapplied Science*. Victoria, BC: Trafford, 2005.
- Berrios GE: Descriptive psychopathology: conceptual and historical aspects. *Psychol Med* 1984; 14:303-13
- Berrios GE: The history of descriptive psychopathology, in *Psychiatric Epidemiology: Assessment Concepts and Methods*. Edited by Mezzich JE, Jorge MR, Salloum IM. Baltimore, Johns Hopkins University Press, 1994, pp 47-68
- Berrios GE: Classifications in psychiatry: a conceptual history. *Aust N Z J Psychiatry* 1999; 33:145-60
- Beutler LE, Malik ML (eds): *Rethinking the DSM: A Psychological Perspective*. Washington, DC, American Psychological Association, 2002
- Bieber I: On arriving at the American Psychiatric Association decision on homosexuality, in *Scientific Controversies: Case Studies in the Resolution and Closure of Dispute in Science and Technology*. Edited by Engelhardt HT, Caplan A. Cambridge, Cambridge University Press, 1987, pp 417-436

- Birley JL: DSM-III: from left to right or from right to left? *Br J Psychiatry* 1990; 157:116-8
- Blackburn R: On moral judgments and personality disorders: The myth of psychopathic personality revisited. *Br J Psychiatry* 1988; 153:505-512
- Blacker D, Tsuang MT: Contested boundaries of bipolar disorder and the limits of categorical diagnosis in psychiatry. *Am J Psychiatry* 1992; 149:1473-1483
- Blashfield RK: *The Classification of Psychopathology: Neo-Kraepelinian and Quantitative Approaches*. New York, Plenum Press, 1984
- Blashfield RK, Aldenderfer MS: The methods and problems of cluster analysis, in *Handbook of multivariate experimental psychology* (2nd ed.). Perspectives on individual differences. Edited by Nesselroade JR, Cattell RB. New York, NY, Plenum Press, 1988, pp 447-473
- Blashfield RK, Draguns JG: Toward a taxonomy of psychopathology: the purpose of psychiatric classification. *Br J Psychiatry* 1976; 129:574-583
- Blashfield RK, Livesley WJ: Metaphorical analysis of psychiatric classification as a psychological test. *J Abnorm Psychol* 1991; 100:262-270
- Blashfield RK, Sprock J, Fuller, AK: Suggested guidelines for including or excluding categories in the DSM-IV. *Compr Psychiatry* 1990; 31:15-19
- Bolton D, Hill J: *Mind, Meaning, and Mental Disorder: The Nature of Causal Explanation in Psychology and Psychiatry*, second edition. Oxford: Oxford University Press, 2003.
- Boorse C: On the distinction between disease and illness. *Philosophy and Public Affairs* 1975; 5:49-68
- Boorse C: What a theory of mental health should be. *Journal for the Theory of Social Behaviour* 1976; 6:61-84
- Boorse C: Concepts of health, in *Health Care Ethics: An Introduction*. Edited by Van De Ver D, Regan T. Philadelphia, PA, Temple University Press, 1987
- Bracken PJ: Post-modernity and post-traumatic stress disorder. *Soc Sci Med* 2001; 53: 733-43
- Bracken P, Thomas P: *Postpsychiatry: Mental Health in a Postmodern World*. Oxford: Oxford University Press, 2005.
- Brendel DH: *Healing Psychiatry: Bridging the Science/Humanism Divide*. Cambridge, MA: MIT Press, 2006.
- Brody EB: Psychiatric diagnosis in sociocultural context. *J Nerv Ment Dis* 1994; 182:253-255
- Brown LS, Ballou M. *Personality and Psychopathology: Feminist Reappraisals*. New York: Guilford, 1992.
- Brown WM: On defining disease. *J Med Philos* 1985; 10:311-328
- Brumberg JJ: From psychiatric syndrome to "communicable" disease: The case of anorexia nervosa, in *Framing Disease: Studies in Cultural History*. Edited by Rosenberg DE, Gordon J. New Brunswick, NJ, Rutgers University Press, 1992, pp 134-154
- Cantwell DP, Baker L. Issues in the classification of child and adolescent psychopathology. *J Am Acad Child Adol Psychiatry* 1988; 27: 521-533
- Caplan PJ: The Psychiatric Association's failure to meet its own standards: The dangers of self-defeating personality disorder as a category. *J Personal Disord* 1987; 1:178-182
- Caplan PJ: How do they decide who is normal? The bizarre, but true, tale of the DSM process. *Canadian Psychology* 1991; 32:162-170
- Carson RC: Dilemmas in the pathway of the DSM-IV. *J Abn & Soc Psychology* 1991; 100:302-307
- Carson RC: Costly compromises: A critique of the Diagnostic and Statistical Manual of Mental Disorders, in *From Placebo to Panacea: Putting Psychiatric Drugs to the Test*. Edited by Fisher S, Greenberg RP. New York, Wiley and Sons, 1997, pp 98-112
- Chodoff P: DSM-III and psychotherapy. *Am J Psychiatry* 1986; 143:201-203

- Chung MC, Fulford KWM, Graham G: *Reconceiving Schizophrenia*. Oxford: Oxford University Press, 2007.
- Compton WM, Guze SB: The neo-Kraepelinian revolution in psychiatric diagnosis. *Eur Arch Psychiatry Clin Neurosci* 1995; 245:196-201
- Cooper JE: Classification: revising DSM-III and ICD-9. *Br J Psychiatry* 1984; 144:214-215
- Cooper JE: On improving DSM-III and ICD-9. *Am J Psychiatry* 1984; 141:609-610
- Cronbach LJ, Meehl PE: Construct validity in psychological tests. *Psychological Bulletin* 1955; 52:281-302
- Davidson L: Phenomenological research in schizophrenia: From philosophical anthropology to empirical science. *Journal of Phenomenological Psychology* 1994; 25:104-130
- Davis R, Millon T: On the importance of theory to a taxonomy of personality disorders, in *The DSM-IV personality disorders. Diagnosis and treatment of mental disorders*. Edited by Livesley WJ. New York, NY, The Guilford Press, 1995, pp 377-396
- Dawes RM, Faust D, Meehl PE: Clinical versus actuarial judgment. *Science* 1989; 243:1668-1674
- Denton WH: A family systems analysis of DSM-III--R. *Journal of Marital & Family Therapy* 1990; 16:113-125
- Ellenberger HF: The fallacies of psychiatric classification, in *Beyond the Unconscious: Essays of Henri F. Ellenberger in the History of Psychiatry*. Edited by Micale M. Princeton, NJ, Princeton University Press, 1993
- Elliott C: Puppetmasters and personality disorders: Wittgenstein, mechanism, and moral responsibility. *Philosophy, Psychiatry, & Psychology* 1994; 1:91-100
- Engelhardt HT. Clinical problems and the concept of disease, in *Health, Disease, and Causal Explanations in Medicine*. Edited by Nordenfelt L. Boston: D. Reidel, 1984; pp 27-42.
- Eysenck HJ, Wakefield JA Jr, Friedman AF: Diagnosis and clinical assessment: the DSM-III. *Annu Rev Psychol* 1983; 34:167-193
- Fabrega H Jr: Diagnosis interminable: toward a culturally sensitive DSM-IV. *J Nerv Ment Dis* 1992; 180:5-7
- Faraone SV, Tsuang MT: Measuring diagnostic accuracy in the absence of a "gold standard". *American Journal of Psychiatry* 1994; 151:650-657
- Faraone SV, Green AI, Seidman LJ, Tsuang MT: "Schizotaxia": clinical implications and new directions for research. *Schizophr Bull* 2001 27:1-18
- Farmer AE, Williams J, Jones, I: Phenotypic definitions of psychotic illness for molecular genetic research. *American Journal of Medical Genetics (Neuropsychiatric Genetics)* 1994; 54:365-371
- Faust D, Miner RA: The empiricist and his new clothes: DSM-III in perspective. *Am J Psychiatry* 1986; 143:962-967
- First MB: The DSM series and experience with DSM-IV. *Psychopathology* 2002; 35:67-71
- First MB: Clinical utility: a prerequisite for the adoption of a dimensional approach in DSM. *J Abnorm Psychol* 2005; 114:560-564
- First MB: Desire for amputation of a limb: paraphilia, psychosis, or a new type of identity disorder. *Psychol Med* 2005; 35:919-928
- First MB: Mutually exclusive versus co-occurring diagnostic categories: the challenge of diagnostic comorbidity. *Psychopathology* 2005; 38:206-210
- First MB: Weighing the pro's and con's of reclassifying dyspareunia. *Arch Sex Behav* 2005; 34:30-32, 57-61; author reply 63-67
- First MB: Beyond clinical utility: broadening the DSM-V research appendix to include alternative diagnostic constructs. *Am J Psychiatry* 2006; 163:1679-1681
- First MB: Relational processes in the DSM-V revision process: comment on the special section. *J Fam Psychol* 2006; 20:356-358

- First MB, Pincus HA: Classification in psychiatry: ICD-10 v. DSM-IV. A response. *Br J Psychiatry* 1999; 175:205-209
- First MB, Pincus HA, Levine JB, Williams JB, Ustun B, Peele R: Clinical utility as a criterion for revising psychiatric diagnoses. *Am J Psychiatry* 2004; 161:946-954
- Flanagan EH, Blashfield RK: Essentialism and a folk-taxonomic approach to the classification of psychopathology. *Philosophy, Psychiatry, & Psychology* 2000; 7:183-189
- Ford MR, Widiger TA: Sex bias in the diagnosis of histrionic and antisocial personality disorders. *J Consult Clin Psychol* 1989; 57:301-305
- Frances AJ, First MB, Pincus HA: Conceptual issues in psychiatric diagnosis. *DSM-IV Guidebook: The Essential Companion to the Diagnostic and Statistical Manual of Mental Disorders, Fourth Edition*. Washington, DC, American Psychiatric Press, 1995, pp 13-24
- Frances AJ, First MB, Widiger TA, Miele GM, Tilly SM, Davis WW, Pincus HA: An A to Z guide to DSM-IV conundrums. *J Abnorm Psychol* 1991; 100:407-412
- Frances AJ, Widiger TA, First MB, Pincus HA: DSM-IV: Toward a more empirical diagnostic system. *Canadian Psychology* 1991; 32:171-173
- Frances AJ, Widiger TA, Pincus HA: The development of DSM-IV. *Archives of General Psychiatry* 1989; 46:373-375
- Frances AJ, Widiger TA, Sabshin M: Psychiatric diagnosis and normality, in *The diversity of normal behavior: Further contributions to normatology*. Edited by Offer D, Sabshin M. New York, NY, Basic Books, Inc, 1991, pp 3-38
- Fulford, K.W.M. *Moral Theory and Medical Practice*. Cambridge: Cambridge University Press, 1989
- Fulford KWM: The concept of disease, in *Psychiatric Ethics*. Edited by Bloch S and Chodoff P. Oxford, Oxford University Press, 1991
- Fulford KWM: Commentary on "Aristotle's function argument and the concept of mental illness." *Philosophy, Psychiatry, & Psychology* 1998; 5:216-220
- Fulford KWM: Nine variations and a coda on the theme of an evolutionary definition of dysfunction. *Journal of Abnormal Psychology* 1999; 108:412-420
- Fulford KWM: Teleology without tears: Naturalism, neo-naturalism, and evaluationism in the analysis of function statements in biology (and a bet on the twenty-first century). *Philosophy, Psychiatry, & Psychology* 2000; 7:77-94
- Fulford KWM: Values in psychiatric diagnosis: Executive summary of a report to the chair of the ICD-12/DSM-VI Coordination Task Force (Dateline 2010). *Psychopathology* 2002; 35:132-138
- Fulford KWM: Values in psychiatric diagnosis: developments in policy, training, and research. *Psychopathology* 2005; 38: 171-6.
- Fulford KWM, Broome M, Stanghellini G, Thornton T: Looking with both eyes open: fact and value in psychiatric diagnosis? *World Psychiatry* 2005; 4: 78-86.
- Fulford KWM, Thornton T, Graham G: *Oxford textbook of philosophy and psychiatry*. Oxford: Oxford University Press, 2006.
- Gaines AD: *Ethnopsychiatry: The Cultural Construction of Professional and Folk Psychiatries*. Albany, NY, State University of New York Press, 1992
- Gaines AD: From DSM-I to III-R; voices of self, mastery and the other: a cultural constructivist reading of U.S. psychiatric classification. *Soc Sci Med* 1992; 35:3-24
- Gaines AD: Culture-specific delusions. Sense and nonsense in cultural context. *Psychiatr Clin North Am* 1995; 18:281-301
- Garb HN: Taxometrics and the revision of diagnostic criteria. *Am Psychol* 1996; 51:553-554

- Genero N, Cantor N: Exemplar prototypes and clinical diagnosis: Toward a cognitive economy. *Journal of Social & Clinical Psychology* 1987; 5:59-78
- Ghaemi SN: On defining 'mood stabilizer'. *Bipolar Disorders* 2001; 3: 154-8.
- Ghaemi SN: *The Concepts of Psychiatry*. Baltimore: The Johns Hopkins University Press, 2003.
- Ghaemi SN: Existence and pluralism: the rediscovery of Karl Jaspers. *Psychopathology* 2007; 40: 75-82.
- Ghaemi SN: Feeling and time: the phenomenology of mood disorders, depressive realism, and existential psychotherapy. *Schizophr Bull* 2007; 33: 122-30
- Ghaemi SN, Martin A: Defining the boundaries of childhood bipolar disorder. *Am J Psychiatry* 2007; 164: 185-8.
- Gilmour JSL: The development of taxonomic theory since 1851. *Nature* 1951; 168:400-402
- Gipps RG, Fulford KWM. Understanding the clinical concept of delusion: from an estranged to an engaged epistemology. *Int Rev Psychiatry* 2004; 16: 225-35.
- Good BJ: Culture, diagnosis and comorbidity. *Culture, Medicine & Psychiatry* 1992; 16:427-446
- Good BJ: Culture and DSM-IV: Diagnosis, knowledge and power. *Culture, Medicine & Psychiatry* 1996; 20:127-132
- Gottesman II, Gould TD: The endophenotype concept in psychiatry: etymology and strategic intentions. *Am J Psychiatry* 2003; 160:636-645
- Graham G, Stephens GL: *Philosophical Psychopathology*. Cambridge, MA: MIT Press, 1994.
- Grayson DA: Can categorical and dimensional views of psychiatric illness be distinguished? *British Journal of Psychiatry* 1987; 151:355-361
- Guze SB: Diagnosis in psychiatry: Philosophical and conceptual issues, in *Reflections on Modern Psychiatry*. Edited by Kupfer D. Washington, DC, American Psychiatric Press, 1992
- Hacking I: Multiple personality disorder and its hosts. *History of the Human Sciences* 1992; 5:3-31
- Hacking I: The looping effects of human kinds, in *Causal Cognition*. Edited by Sperber D, Premack, D. Oxford/New York, Oxford University Press - Clarendon Press, 1995
- Hacking I: Multiple personality and gender: A historical approach, in *Gender and psychopathology*. Edited by Seeman MV. Washington, DC, American Psychiatric Press, Inc, 1995, pp 17-40
- Hacking I: *Rewriting the Soul: Multiple Personality and the Sciences of Memory*. Princeton, NJ, Princeton University Press, 1995
- Hacking I: Normal people, in *Modes of thought: Explorations in culture and cognition*. Edited by Olson DR, Torrance N. New York, NY, Cambridge University Press, 1996, pp 59-71
- Hacking I: *Mad Travelers: Reflections on the Reality of Transient Mental Illnesses*. Charlottesville, VA, The University Press of Virginia, 1998
- Hacking I: *The Social Construction of What?* Cambridge, MA, Harvard University Press, 1999
- Hacking I: Degeneracy, criminal behavior, and looping, in *Genetics and criminal behavior. Cambridge studies in philosophy and public policy*. Edited by Wasserman D, Wachbroit R. New York, NY, Cambridge University Press, 2001, pp 141-167
- Harre R: Varieties of theorizing and the project of psychology. *Theory & Psychology* 2000; 10:57-62
- Harris HW, Schaffner KF: Molecular genetics, reductionism, and disease concepts in psychiatry. *J Med Philos* 1992; 17:127-153
- Haynes SN, O'Brien WH: The Gordian knot of DSM-III--R use: Integrating principles of behavior classification and complex causal models. *Behavioral Assessment* 1988; 10:95-105
- Helzer JE, Coryell W: More on DSM III: how consistent are precise criteria? *Biol Psychiatry* 1983; 18:1201-1203

- Helzer JE, Hudziak JJ, editors: *Defining Psychopathology in the 21st Century: DSM-V and Beyond*. Washington, DC, American Psychiatric Publishing, Inc, 2002
- Helzer JE, Robins LN, Taibleson N, Woodruff RA Jr, Reich T, Wish ED: Reliability of psychiatric diagnosis. I. A methodological review. *Arch Gen Psychiatry* 1977; 34:129-133
- Henderson AS, Jablensky A, Sartorius N: ICD-10: a neuropsychiatrist's nightmare? *Br J Psychiatry* 1994; 165:273-275
- Himmelhoch J, Mezzich J, Ganguli M: Controversies in psychiatry: The usefulness of DSM-III. *Psychiatric Annals* 1991; 21:621-631
- Hoehne KA: Classification vs typology. A difference of practical importance. *JAMA* 1980; 244:1099-1100
- Holton G, Grinnell F: Defining misconduct. *Science* 1996; 273:858
- Horwitz AV: The sociological study of mental illness: A critique and synthesis of four perspectives, in *Handbook of sociology of mental health. Handbook of sociology and social research*. Edited by Aneshensel CS, Phelan JC. New York, NY, Kluwer Academic/Plenum Publishers, 1999, pp 57-78
- Horwitz AV: *Creating mental illness*. Chicago, IL, University of Chicago Press, 2002
- Houts AC: Effects of clinician theoretical orientation and patient explanatory bias on initial clinical judgments. *Professional Psychology - Research & Practice* 1984; 15:284-293
- Houts AC: The contextualist turn in empirical social science: Epistemological issues, methodological implications, and adjusted expectations, in *Context and development*. Edited by Cohen R, Siegel AW. Hillsdale, NJ, Lawrence Erlbaum Associates, Inc, 1991, pp 25-54
- Houts AC: Fifty years of psychiatric nomenclature: Reflections on the 1943 War Department Technical Bulletin, Medical 203. *Journal of Clinical Psychology* 2000; 56:935-967
- Houts AC: The diagnostic and statistical manual's new white coat and circularity of plausible dysfunctions: Response to Wakefield, Part 1. *Behaviour Research & Therapy* 2001; 39:315-345
- Hughes CC: The glossary of "culture-bound syndromes" in DSM-IV: A critique. *Transcultural Psychiatry* 1998; 35:413-421
- Hughes JC, Louw SJ, Sabat SR: *Dementia: Mind, Meaning, and the Person*. Oxford: Oxford University Press, 2006.
- Hyman SE: Neuroscience, genetics, and the future of psychiatric diagnosis. *Psychopathology* 2002; 35:139-144
- Hyman SE, Fenton WS: What are the right targets for psychopharmacology? *Science* 2003; 299: 350-351
- Jablensky A: Current trends in the methodology of classification. *Acta Psychiatr Belg* 1986; 86:556-67
- Jablensky A: Methodological issues in psychiatric classification. *Br J Psychiatry* 1988; (suppl 1):15-20
- Jablensky A: Politics and mental health I. *Int J Soc Psychiatry* 1992; 38:24-29
- Jablensky A: Impact of the new diagnostic systems on psychiatric epidemiology, in *International Review of Psychiatry, Volume I*. Edited by Costa e Silva JA, Nadelson C. Washington, DC, American Psychiatric Press, 1993
- Jablensky A: Methodologic issues in psychiatric classification. *Psychiatric Epidemiology: Assessment, Concepts, and Methods*. Baltimore, MD, The Johns Hopkins University Press, 1994, pp 69-80
- Jablensky A: The conflict of the nosologists: views on schizophrenia and manic-depressive illness in the early part of the 20th century. *Schizophr Res* 1999; 39:95-100; discussion 159
- Jablensky A: The nature of psychiatric classification: issues beyond ICD-10 and DSM-IV. *Aust N Z J Psychiatry* 1999; 33:137-144
- Jablensky A: Classification of nonschizophrenic psychotic disorders: a historical perspective. *Curr Psychiatry Rep* 2001; 3:326-331

- Jablensky A: The classification of personality disorders: critical review and need for rethinking. *Psychopathology* 2002; 35:112-116
- Jablensky A: Categories, dimensions, and prototypes: Critical issues for psychiatric classification. *Psychopathology* 2005; 38: 201-5.
- Jablensky A: Subtyping schizophrenia: Implications for genetic research. *Mol Psychiatry* 2006; 11: 815-36.
- Jablensky A, Hugler H, Von Cranach M, Kalinov K: Kraepelin revisited: a reassessment and statistical analysis of dementia praecox and manic-depressive insanity in 1908. *Psychol Med* 1993; 23:843-858
- Jablensky A, Kendell RE: Criteria for assessing a classification in psychiatry, in *Psychiatric Diagnosis and Classification*. Edited by Maj M, Gaebel W, Lopez-Ibor JJ, Sartorius N. Chinchester, John Wiley and Sons, 2002, pp 1-24
- Jackson M, Fulford KWM: Spiritual experience and psychopathology. *Philosophy, Psychiatry, & Psychology* 1997; 4:41-65
- Janca A, Kastrup M, Katschnig H, Lopez-Ibor JJ Jr, Mezzich JE, Sartorius N: Contextual aspects of mental disorders: a proposal for axis III of the ICD-10 multi-axial system. *Acta Psychiatr Scand* 1996; 94:31-36
- Jaspers K, Hoenig J, Hamilton MW: *General psychopathology*, Vol. 1. Baltimore, MD, The Johns Hopkins University Press, 1997
- Jaspers K, Hoenig J, Hamilton MW: *General psychopathology*, Vol. 2. Baltimore, MD, The Johns Hopkins University Press, 1997
- Jenkins JH: Conceptions of schizophrenia as a problem of nerves: A cross-cultural comparison of Mexican-Americans and Anglo-Americans. *Social Science & Medicine* 1988; 26:1233-1243
- Jenkins JH: (1992). Theoretical considerations of qualitative method: Behavioral science research of relevance to primary care interventions. Tudiver, Fred (Ed); Bass, Martin J.
- Jenkins JH: Culture, emotion, and psychopathology, in *Emotion and culture: Empirical studies of mutual influence*. Edited by Kitayama S, Markus HR. Washington, DC, American Psychological Association, 1994, pp 309-335
- Kaplan M: The issue of sex bias in DSM-III: Comments on the articles by Spitzer, Williams, and Kass. *American Psychologist* 1983; 38:802-803
- Kaplan M: A woman's view of DSM-III. *American Psychologist* 1983; 38:786-792
- Kaslow FW: Relational diagnosis: An idea whose time has come? *Family Process* 1993; 32:255-259
- Kass F, Spitzer RL, Williams JB, Widiger T: Self-defeating personality disorder and DSM-III-R: development of the diagnostic criteria. *Am J Psychiatry* 1989; 146:1022-1026
- Kendell RE: The stability of psychiatric diagnosis. *Br J Psychiatry* 1974; 124:352-356
- Kendell RE: The concept of disease and its implications for psychiatry. *Br J Psychiatry* 1975; 127:305-315
- Kendell RE: Psychiatric diagnosis in Britain and the United States. *Br J Psychiatry* 1975; 9:453-461
- Kendell RE: (1988). What is a case? Food for thought for epidemiologists. *Arch Gen Psychiatry* 1988; 45:374-376
- Kendell RE: Clinical validity. *Psychol Med* 1989; 19:45-55
- Kendell RE: The distinction between mental and physical illness. *Br J Psychiatry* 2001; 178:490-493
- Kendell RE: The distinction between personality disorder and mental illness. *Br J Psychiatry* 2002; 180:110-115
- Kendler KS: Toward a scientific psychiatric nosology. Strengths and limitations. *Arch Gen Psychiatry* 1990; 47:969-973
- Kendler KS: Setting boundaries for psychiatric disorders. *Am J Psychiatry* 1999; 156:1845-1848
- Kendler KS: "A gene for...": the nature of gene action in psychiatric disorders. *Am J Psychiatry* 2005; 162:1243-1252

- Kendler KS: Psychiatric genetics: a methodologic critique. *Am J Psychiatry* 2005; 162:3-11
- Kendler KS: Toward a philosophical structure for psychiatry. *Am J Psychiatry* 2005; 162:433-440
- Kendler KS, Zachar P: Psychiatric disorders: a conceptual taxonomy. *Am J Psychiatry* 2007; 164: 557-565).
- Kirmayer LJ. The place of culture in psychiatric nosology: Taijin Kyofusho and DSM-III-R. *J Nerv Ment Dis* 1991; 179: 19-28.
- Kirmayer LJ. Culture, context, and experience in psychiatric diagnoses. *Psychopathology* 2005; 38: 192-6.
- Klein DF: A proposed definition of mental illness, in *Critical Issues in Psychiatric Diagnosis*. Edited by Spitzer RL, Klein DF. New York, Raven Press, 1978, pp 41-72
- Klein DF: The pharmacological validation of psychiatric diagnosis (with discussion), in *The Validity of Psychiatric Diagnosis*. Edited by Robins LN, Barrett JE. New York, Raven Press, 1989, pp 203-216
- Kleinman A: Major conceptual and research issues for cultural (anthropological) psychiatry. *Cult Med Psychiatry* 1980; 4:3-13
- Kleinman A: Anthropology and psychiatry. The role of culture in cross-cultural research on illness. *Br J Psychiatry* 1987; 151:447-454
- Kleinman A: *Rethinking Psychiatry: From Cultural Category to Personal Experience*. New York, The Free Press, 1988
- Kleinman A: How is culture important for DSM-IV? *Culture and Psychiatric Diagnosis: A DSM-IV Perspective*. Washington, DC, American Psychiatric Press, 1996, pp 15-25
- Kleinman A: Triumph or pyrrhic victory? The inclusion of culture in DSM-IV. *Harv Rev Psychiatry* 1997; 4:343-344
- Kleinman A: Why psychiatry and cultural anthropology still need each other. *Psychiatry* 2001; 64:14-16
- Klerman GL: Historical perspectives on contemporary schools of psychopathology, in *Contemporary Directions in Psychopathology: Towards the DSM-IV*. Edited by Millon T, Klerman GL. New York, Guilford Press, 1986, pp 3-28
- Klerman GL: An American perspective on the conceptual approaches to psychopathology, in *Concepts of Mental Disorder: A Continuing Debate*. Edited by Kerr A, McClelland H. London, Gaskell/Royal College of Psychiatrists, 1991
- Klerman GL, Vaillant GE, Spitzer RL, Michels R: A debate on DSM-III. *Am J Psychiatry* 1984; 141:539-553
- Kramer P: *Listening to Prozac*. New York, Viking, 1993
- Kremen WS, Tsuang MT, Faraone SV, Lyons MJ. Using vulnerability indicators to compare conceptual models of genetic heterogeneity in schizophrenia. *J Nerv Ment Dis* 1992; 180: 141-152.
- Kupers TA: Diagnosis: Is there gender bias in the 1994 Diagnostic and Statistical Manual (DSM-IV)?, in *Women, Men, and Gender: Ongoing Debates*. Edited by Walsh MR. New Haven/London, Yale University Press, 1997, pp 337-347
- Kutchins H, Kirk SA: The reliability of DSM-III: A critical review. *Social Work Research & Abstracts* 1986; 22: 3-12
- Kutchins H, Kirk SA: The business of diagnosis: DSM-III and clinical social work. *Social Work* 1988; 33:215-220
- Kutchins H, Kirk SA: DSM-III--R: The conflict over new psychiatric diagnoses. *Health & Social Work* 1989; 14:91-101
- Lander ES, Kruglyak L: Genetic dissection of complex traits: Guidelines for interpreting and reporting linkage results. *Nature Genetics* 1995; 11:241-247
- Langenbucher JW, Morgenstern J, Labouvie E, Miller KJ, Nathan PE: On criterion weighting in the DSM-IV. *Journal of Consulting & Clinical Psychology* 1996; 64:343-356



- Larkin J, Caplan PJ: The gatekeeping process of the DSM. *Canadian Journal of Community Mental Health* 1992; 11:17-28
- Lewis JW: ICD-10: A neuropsychiatrist's nightmare? *British Journal of Psychiatry* 1994; 164:157-158
- Lilienfeld SO, Marino L. Mental disorder as a Roschian concept: A critique of Wakefield's "harmful dysfunction." *J Abn Psychology* 1995; 104: 411-420.
- Lindqvist G, Malmgren H: Organic mental disorders as hypothetical pathogenetic processes. *Acta Psychiatr Scand Suppl* 1993; 373:5-17
- Lipowski ZJ: Is "organic" obsolete? *Psychosomatics* 1990; 31:342-344
- Lipowski ZJ: Organic mental disorders and DSM-IV. *Am J Psychiatry* 1990; 147:947
- Livesley WJ: The classification of personality disorder: I. The choice of category concept. *Can J Psychiatry* 1985; 30:353-358
- Livesley WJ: The classification of personality disorder: II. The problem of diagnostic criteria. *Can J Psychiatry* 1985; 30:359-362
- Livesley WJ: Trait and behavioral prototypes of personality disorder. *Am J Psychiatry* 1986; 143:728-732
- Livesley WJ: Suggestions for a framework for an empirically based classification of personality disorder. *Can J Psychiatry* 1998; 43:137-147
- Livesley WJ: Commentary on reconceptualizing personality disorder categories using trait dimensions. *J Pers* 2001; 69:277-286
- Livesley WJ: A framework for integrating dimension and categorical classifications of personality disorder. *J Personal Disord* 2007; 21: 199-224
- Livesley WJ, Jackson DN: Guidelines for developing, evaluating, and revising the classification of personality disorders. *J Nerv Ment Dis* 1992; 180:609-618
- Livesley WJ, Jang KL: Toward an empirically based classification of personality disorder. *J Personal Disord* 2000; 14:137-151
- Livesley WJ, Schroeder ML, Jackson DN, Jang KL: Categorical distinctions in the study of personality disorder: Implications for classification. *Journal of Abnormal Psychology* 1994; 103:6-17
- Lock M: DSM-III as a culture-bound construct: Commentary on culture-bound syndromes and international disease classifications. *Culture, Medicine & Psychiatry* 1987; 11:35-42
- Loring M, Powell B: Gender, race and DSM-III: A study of the objectivity of psychiatric diagnostic behavior. *Journal of Health and Social Behavior* 1988; 29:1-22
- Lukoff D, Lu F, Turner R: Toward a more culturally sensitive DSM-IV. Psychoreligious and psychospiritual problems. *J Nerv Ment Dis* 1992; 180:673-682
- Lukoff D, Lu F, Turner R: Diagnosis: A transpersonal clinical approach to religious and spiritual problems, in *Textbook of Transpersonal Psychiatry and Psychology*. Edited by Scotton BW, Chinen AB, Battista JR. New York, Basic Books, 1996, pp 231-249
- Mahowald MB: To be or not to be a woman: Anorexia nervosa, normative gender roles, and feminism. *J Med Philos* 1992; 17: 233-51.
- Malmgren H: Psychiatric classification: The status of so-called "diagnostic criteria.", in *Health, Disease, and Causal Explanations in Medicine*. Edited by Nordenfelt L, Lindahl BIB. Boston, MA, D. Reidel, 1984
- Malmgren H: Psychiatric classification and empiricist theories of meaning. *Acta Psychiatr Scand Suppl* 1993; 373:48-64
- Malmgren H, Lindqvist G: (1993). The semantic status of diagnostic criteria for organic mental syndromes and disorders in DSM-III and DSM-III-R. *Acta Psychiatr Scand Suppl* 1993; 373:33-47

- Malt UF: Philosophy of science and DSM-III. Philosophical, idea-historical and sociological perspectives on diagnoses. *Acta Psychiatr Scand Suppl* 1986; 328:10-17
- Malt UF: Teaching DSM-III to clinicians. Some problems of the DSM-III system reducing reliability, using the diagnosis and classification of depressive disorders as an example. *Acta Psychiatr Scand Suppl* 1986; 328:68-75
- Margolis J: The trouble with schizophrenia, in *What is Schizophrenia?* Edited by Flack WF Jr, Miller DR, Wiener R. New York, Springer-Verlag, 1991
- Matthews E: *Body-subjects and disordered minds: Treating the whole person in psychiatry*. Oxford: Oxford University Press, 2007.
- McConaghy N: Heterosexuality/homosexuality: dichotomy or continuum. *Arch Sex Behav* 1987; 16:411-424
- McGrath J: Psychiatry, molecular genetics and ethics: The new discoveries and the new issues. *Australian & New Zealand Journal of Psychiatry* 1989; 23:67-72
- McGuire MT: Phenomenological classification systems: the case of DSM-III. *Perspect Biol Med* 1986; 30: 135-147
- McGuire MT, Essock-Vitale SM: Psychiatric disorders in the context of evolutionary biology. A functional classification of behavior. *J Nerv Ment Dis* 1981; 169:672-686
- McGuire MT, Essock-Vitale SM, Polsky RH: Psychiatric disorders in the context of evolutionary biology. An ethological model of behavioral changes associated with psychiatric disorders. *J Nerv Ment Dis* 1981; 169:687-704
- McHugh PR: A structure for psychiatry at the century's turn—the view from Johns Hopkins. *J R Soc Med* 1992; 85: 483-7.
- McHugh PR: *What's the story? The American Scholar* 1995; 64:191-203
- McHugh PR, Slavney PR: *The Perspectives of Psychiatry, Second Edition*. Baltimore, MD, The Johns Hopkins University Press, 1998
- McReynolds WT: DSM-III and the future of applied social science. *Professional Psychology - Research & Practice* 1979; 10:123-132
- Medin DL, Ortony A: Psychological essentialism, in *Similarity and analogical reasoning*. Edited by Vosniadou S, Ortony A. New York, NY, Cambridge University Press, 1989, pp 179-195
- Meehl PE: *Clinical versus statistical prediction: A theoretical analysis and a review of the evidence*. Northvale, NJ, Jason Aronson, Inc, 1954
- Meehl PE: Schizotaxia, schizotypy, schizophrenia. *Am Psychol* 1962; 17:827-838
- Meehl PE: *Psychodiagnosis: Selected Papers*. Minneapolis, University of Minnesota Press, 1973
- Meehl PE: A funny thing happened to us on the way to the latent entities. *J Personality Assessment* 1979; 43:563-577
- Meehl PE: Schizotaxia revisited. *Archives of General Psychiatry* 1989; 46:935-944
- Meehl PE: Toward an integrated theory of schizotaxia, schizotypy, and schizophrenia. *J Personal Disord* 1990; 4:1-99
- Meehl PE: Why summaries of research on psychological theories are often uninterpretable. *Psychological Reports* 1990; 66:195-244
- Meehl PE: Bootstraps taxometrics: Solving the classification problem in psychopathology. *Am Psychol* 1995; 50:266-275
- Meehl PE, McClosky H: Ethical and political aspects of applied psychology. *J Abn & Soc Psychol* 1947; 42:91-98
- Mezzich JE: Comprehensive diagnosis: a conceptual basis for future diagnostic systems. *Psychopathology* 2002; 35:162-165

- Mezzich JE: Positive health: conceptual place, dimensions and implications. *Psychopathology* 2005; 38: 177-9.
- Mezzich JE: Psychiatry for the person: articulating medicine's science and humanism. *World Psychiatry* 2007; 6: 1-3.
- Mezzich JE, Berganza CE: Purposes and models of diagnostic systems. *Psychopathology* 2005; 34: 162-5.
- Mezzich JE, Fabrega H Jr, Kleinman A: Cultural validity and DSM-IV. *J Nerv Ment Dis* 1992; 180:4
- Mezzich JE, Kirmayer LJ, Kleinman A, Fabrega H Jr, Parron DL, Good BJ, Lin KM, Manson KM: The place of culture in DSM-IV. *J Nerv Ment Dis* 1999; 187:457-464
- Mezzich JE, Kleinman A, Fabrega H Jr, Parron DL, editors: *Culture and Psychiatric Diagnosis: A DSM-IV Perspective*. Washington, DC, American Psychiatric Press, Inc, 1996
- Millon T: The DSM-III: An insider's perspective. *Am Psychol* 1983; 38:804-814
- Millon T: Classification in psychopathology: Rationale, alternatives, and standards. *Journal of Abnormal Psychology* 1991; 100:245-261
- Millon T: Personality disorders: Conceptual distinctions and classification issues, in *Personality disorders and the five-factor model of personality*. Edited by Costa P, Widiger TA. Washington, American Psychological Association Press, 1993
- Millon T: *Personality and psychopathology: Building a clinical science: Selected papers of Theodore Millon*. New York, NY, John Wiley & Sons, 1996
- Millon T: Reflections on the future of DSM Axis II. *Journal of Personality Disorders* 2000; 14:30-41
- Millon T, Klerman GL, editors: *Contemporary directions in psychopathology: Toward the DSM-IV*. New York, NY, The Guilford Press, 1986
- Mindham RH, Scadding JG, Cawley RH: Diagnoses are not diseases. *British Journal of Psychiatry* 1992; 161:686-691
- Mirowski J, Ross CE: Psychiatric diagnosis as reified measurement. *Journal of Health & Social Behavior* 1989; 30:11-25
- Mishara AL: Narrative and psychotherapy—the phenomenology of healing. *Am J Psychother* 1994; 49: 180-95.
- Murphy D: 2006. *Psychiatry in the Scientific Image*. Cambridge, MA, MIT Press, 2006
- Murphy D, Woolfolk RL: Conceptual analysis versus scientific understanding: An assessment of Wakefield's folk psychiatry. *Philosophy, Psychiatry, & Psychology* 2000; 7:271-293
- Murphy D, Woolfolk RL: The harmful dysfunction analysis of mental disorder. *Philosophy, Psychiatry, & Psychology* 2000; 7:241-252
- Murphy EA: Classification and its alternatives, in *Clinical Judgement: A Critical Appraisal*. Edited by Engelhardt HT, Spicker SF, Towers B. Boston, MA, D. Reidel, 1979
- Nathan PE: DSM-IV: Empirical, accessible, not yet ideal. *Journal of Clinical Psychology* 1994; 50:103-110
- Nathan PE: The DSM-IV and its antecedents: Enhancing syndromal diagnosis, in *Making diagnosis meaningful: Enhancing evaluation and treatment of psychological disorders*. Edited by Barron JW. Washington, DC, American Psychological Association, 1998, pp 3-27
- Nathan PE, Langenbucher JW: Psychopathology: Description and classification. *Annual Review of Psychology* 1999; 50:79-107
- Naudin JC, Gros-Azorin C, Mishara A, et al. The use of the Husserlian reduction as a method of investigation in psychiatry. *Journal of Consciousness Studies* 1999; 6: 155-171.
- Neisser U, Jopling DA (eds): *The Conceptual Self in Context*. Cambridge, Cambridge University Press, 1997.
- Nelson-Gray RO: DSM-IV: Empirical guidelines from psychometrics. *J Abn Psychology* 1991; 100:308-315
- Nissim-Sabat M: Psychiatry, psychoanalysis, and race. *Philosophy, Psychiatry, & Psychology* 2001; 8: 45-59.

- Nordenfelt L: Rationality and compulsion: Applying action theory to psychiatry. Oxford: Oxford University Press, 2007.
- Nuckolls CW: Toward a cultural history of the personality disorders. *Soc Sci Med* 1992; 35:37-47
- Parnas J: The concept of borderline conditions: A critical comment on validity issues. *Acta Psychiatrica Scandinavica* 1994; 89(suppl 379):26-31
- Parnas J: From predisposition to psychosis: Progression of symptoms in schizophrenia. *Acta Psychiatrica Scandinavica* 1999; 99(suppl 395):20-29
- Parnas J, Bovet P: Negative/positive symptoms of schizophrenia: Clinical and conceptual issues. *Nordic Journal of Psychiatry* 1994; 48(suppl 31):5-14
- Parnas J, Bovet P: Research in psychopathology: Epistemologic issues. *Comprehensive Psychiatry* 1995; 36:167-181
- Parnas J, Handest P, Jansson L, Saebye D. Anomalous subjective experience among first-admitted schizophrenia spectrum patients: empirical investigation. *Psychopathology* 2005; 38: 259-67
- Parnas J, Zahavi D: The role of phenomenology in psychiatric diagnosis and classification, in *Psychiatric Diagnosis and Classification*. Edited by Maj M, Wolfgang G, Lopez-Ibor JJ, Sartorius N. Chichester, John Wiley and Sons, 2002, pp 137-163
- Parshall AM, Priest RG: Nosology, taxonomy and the classification conundrum of the functional psychoses. *Br J Psychiatry* 1993; 162:227-36; discussion 237-238
- Phillips J: Key concepts: Hermeneutics. *Philosophy, Psychiatry, & Psychology* 1996; 3:61-69
- Phillips J: Peircean reflections on psychotic discourse. In *Peirce, semiotics, and psychoanalysis*. Edited by Muller J, Brent J. Baltimore, MD Johns Hopkins University Press, pp 16-36.
- Phillips J, Maurel-Raymondet M: Peirce and semiotic vulnerability in schizophrenia. *Evolution Psychiatrique* 1997; 62: 369-379.
- Phillips J, Morley J: *Imagination and its pathologies*. Cambridge MA: MIT Press, 2003.
- Pichot P: Nosological models in psychiatry. *British Journal of Psychiatry* 1994; 164:232-240.
- Pickering N: *The metaphor of mental illness*. Oxford: Oxford University Press, 2006.
- Pincus HA, Frances A, Davis WW, First MB, Widiger TA: DSM-IV and new diagnostic categories: Holding the line on proliferation. *Am J Psychiatry* 1992; 149:112-117
- Pincus HA, Zarin DA, First MB: "Clinical significance" and DSM-IV. *Arch Gen Psychiatry* 1998; 55:1145; discussion 1147-1148
- Potter NN: Key Concepts: Feminism. *Philosophy, Psychiatry, & Psychology* 2001; 8: 61-71.
- Potter NN: What is manipulative behavior, anyway? *J Personal Disord* 2006; 20: 139-56.
- Potter NN (ed.): *Trauma, Truth, and Reconciliation: Healing Damaged Relationships*. Oxford: Oxford University Press, 2006.
- Radden J: Recent criticism of psychiatric nosology: A review. *Philosophy, Psychiatry, & Psychology* 1994; 1:193-200
- Radden J: Lumps and bumps: Kantian faculty psychology, phrenology, and twentieth-century psychiatric classification. *Philosophy, Psychiatry, & Psychology* 1996; 3: 1-14.
- Radden J: *Divided Minds and Successive Selves: Ethical Issues in Disorders of Identity and Personality*. Cambridge, MA: MIT Press, 1996.
- Radden J: *The Nature of Melancholy: From Aristotle to Kristeva*. New York: Oxford University Press, 2000.
- Radden J (ed.): *The Philosophy of Psychiatry: A Companion*. New York: Oxford University Press, 2004.

- Raine A: Crime and the nature of psychopathology. *The Psychopathology of Crime: Criminal Behavior as a Clinical Disorder*. San Diego, CA, Academic Press, 1993, pp 1-26
- Raine A: Is crime a disorder? *The Psychopathology of Crime: Criminal Behavior as a Clinical Disorder*. San Diego, CA, Academic Press, 1993, pp 287-321
- Richardson FC, Fowers BJ, Guignon CB. *Re-envisioning psychology: Moral dimension of theory and practice*. San Francisco: Jossey- Bass, 1999.
- Ritchie K: The little woman meets son of DSM-III. *J Med Philos* 1989; 14:695-708
- Robins LN: Diagnostic grammar and assessment: Translating criteria into questions. *Psychol Med* 1989; 19:57-68
- Robins LN, Barrett JL: *The Validity of Psychiatric Diagnosis*. New York, Raven Press, 1989
- Rogler LH: The role of culture in mental health diagnosis: the need for programmatic research. *J Nerv Ment Dis* 1992; 180:745-747
- Ross R, Frances AJ, Widiger TA: Gender issues in DSM-IV, in *Women, Men, and Gender: Ongoing Debates*. Edited by Walsh MR. New Haven, CT, Yale University Press, 1997; pp 348-357
- Rubenstein G: The decision to remove homosexuality from the DSM: Twenty years later. *American Journal of Psychotherapy* 1995; 49:416-427
- Sadler JZ: Epistemic value commitments in the debate over categorical vs. dimensional personality diagnosis. *Philosophy, Psychiatry, & Psychology* 1996; 3:203-222
- Sadler JZ: Rationales, values, and DSM-IV: the case of "medication-induced movement disorders". *Compr Psychiatry* 1996; 37:441-451
- Sadler JZ: Recognizing values: a descriptive-causal method for medical/scientific discourses. *J Med Philos* 1997; 22:541-565
- Sadler JZ: *Descriptions and prescriptions: values, mental disorders, and the DSMs*. Baltimore, Johns Hopkins University Press, 2002
- Sadler JZ: What can we ever know about the past? A philosophical consideration of the assessment of retrospective mental states, in *Retrospective Assessment of Mental States in Litigation: Predicting the Past*. Edited by Simon RI, Shuman DW. Washington, DC, American Psychiatric Publishing, Inc., 2002, pp 47-71
- Sadler JZ. *Values and Psychiatric Diagnosis*. Oxford: Oxford University Press, 2005.
- Sadler JZ. Bug-eyed and breathless: emerging crises involving values. *World Psychiatry* 2005; 4: 87.
- Sadler JZ. Social context and stakeholders' values in building diagnostic systems. *Psychopathology* 2005; 37: 197-200.
- Sadler JZ. The psychiatric significance of the personal self. *Psychiatry* 2007; 70: 113-29.
- Sadler JZ, Agich GJ: Diseases, functions, values, and psychiatric classification. *Philosophy, Psychiatry, & Psychology* 1995; 2:219-231
- Sadler JZ, Fulford B. Normative warrant in diagnostic criteria: the case of DSM-IV-TR personality disorders. *J Personal Disord* 2006; 20: 170-180.
- Sadler JZ, Hulgus JF, Agich GJ: Hindsight, foresight, and having it both ways: a rejoinder to R. L. Spitzer. *J Nerv Ment Dis* 2001; 189:493-497
- Sadler JZ, Hulgus JF, Agich GJ: On values in recent American psychiatric classification. *J Med Philos* 1994; 19:261-277
- Sadler JZ, Wiggins OP, Schwartz MA, editors: *Philosophical perspectives on psychiatric diagnostic classification*. Johns Hopkins series in psychiatry and neuroscience. Baltimore, MD, The Johns Hopkins University Press, 1994
- Sass LA: *Madness and modernism: Insanity in the light of modern art, literature, and thought*. New York: Basic Books, 1992.

- Sass LA: The paradoxes of delusion: Wittgenstein, Schreber, and the schizophrenia mind. Ithica, NY: Cornell University Press, 1994.
- Sass LA: Schizophrenia, self-consciousness, and the modern mind. *Journal of Consciousness Studies* 1998; 5: 543-565.
- Sass LA: Mind, self, and psychopathology: Reflections on philosophy, theory and the study of mental illness. *Theory & Psychology* 2000; 10: 87-98.
- Sass LA: Self and world in schizophrenia: Three classic approaches. *Philosophy, Psychiatry, & Psychology* 2001; 8: 251-270.
- Sass LA, Parnas J: Phenomenology of self-disturbances in schizophrenia: Some research findings and directions. *Philosophy, Psychiatry, & Psychology* 2001; 8: 347-356.
- Sass LA, Parnas J: Schizophrenia, consciousness, and the self. *Schizophr Bull* 2003; 29: 427-44.
- Sartorius N: Psychiatric classification: is one enough? *Hosp Community Psychiatry* 1983; 34:581
- Schacht TE: DSM-III and the politics of truth. *American Psychologist* 1985; 40:513-521
- Schacht TE: Reply to Spitzer's "Politics-science dichotomy syndrome." *American Psychologist* 1985; 40:562-563
- Schaffner KF: The peripherality of reductionism in the development of molecular biology. *J Hist Biol* 1974; 7:111-139
- Schaffner KF: Theory structure in the biomedical sciences. *J Med Philos* 1980; 5:57-97
- Schaffner KF: Reductionism in biology: Prospects and problems, in *Conceptual Issues in Evolutionary Biology. An Anthology*. Edited by Sober E. Cambridge, MA, MIT Press, 1984
- Schaffner KF: Exemplar reasoning about biological models and diseases: a relation between the philosophy of medicine and philosophy of science. *J Med Philos* 1986; 11:63-80
- Schaffner KF: *Discovery and Explanation in Biology and Medicine*. Chicago, IL, University of Chicago Press, 1993
- Schaffner KF: Genetic explanations of behavior: Of worms, flies, and men, in *Genetics and criminal behavior. Cambridge studies in philosophy and public policy*. Edited by Wasserman D, Wachbroit R. New York, NY, Cambridge University Press, 2001, pp 79-116
- Schwartz MA, Wiggins OP: Logical empiricism and psychiatric classification. *Compr Psychiatry* 1986; 27:101-114
- Schwartz MA, Wiggins OP: Diagnosis and ideal types: a contribution to psychiatric classification. *Compr Psychiatry* 1987; 28:277-291
- Schwartz MA, Wiggins OP: Typifications. The first step for clinical diagnosis in psychiatry. *J Nerv Ment Dis* 1987; 175:65-77
- Schwartz MA, Wiggins OP: Perspectivism and the methods of psychiatry. *Compr Psychiatry* 1988; 29:237-251
- Schwartz MA, Wiggins OP: The hegemony of the DSMs, in *Descriptions and prescriptions: Values, mental disorders, and the DSMs*. Edited by Sadler JZ. Baltimore, MD, Johns Hopkins University Press, 2002, pp 199-209
- Schwartz MA, Wiggins OP, Norko MA: Prototypes, ideal types, and personality disorders: The return to classical psychiatry. *Journal of Personality Disorders* 1989; 3:1-9
- Shaffer D: A participant's observations: preparing DSM-IV. *Can J Psychiatry* 1996; 41:325-329
- Shuman DW: The diagnostic and statistical manual of mental disorders in the courts. *Bull Am Acad Psychiatry Law* 1989; 17:25-32
- Shuman DW: Softened science in the courtroom: Forensic implications of a value-laden classification, in *Descriptions and prescriptions: Values, mental disorders, and the DSMs*. Edited by Sadler JZ. Baltimore, MD, Johns Hopkins University Press, 2002, pp 217-228
- Slavney PR: Affective disorder: The new imperium. *Compr Psychiatry* 1991; 32: 295-302.

- Slavney PR: Belief and behavior: The role of "folk psychology" in psychiatry. *Compr Psychiatry* 1992; 33: 166-72.
- Slavney PR: Pseudoseizures, sexual abuse, and hermeneutic reasoning. *Compr Psychiatry* 1994; 35: 471-7.
- Slavney PR, McHugh PR: The life-story method in psychotherapy and psychiatric education: the development of confidence. *Am J Psychother* 1985; 39: 57-67.
- Smith D, Kraft WA: DSM-III: Do psychologists really want an alternative? *American Psychologist* 1983; 38:777-785
- Sneath PHA, Sokal RR: Numerical taxonomy. *Nature* 1962; 193:855-860
- Sokal RR, Sneath PHA: Principles of Numerical Taxonomy. San Francisco, CA, W. H. Freeman and Company, 1963
- Spitzer M: Psychiatry, philosophy, and the problem of description, in *Psychopathology and Philosophy*. Edited by Spitzer M, Uehlein F, Oepen G. Berlin, Springer-Verlag, 1988
- Spitzer M: On defining delusions. *Compr Psychiatry* 1990; 31:377-397
- Spitzer M: A neurocomputational approach to delusions. *Compr Psychiatry* 1995; 36:83-105
- Spitzer M: A cognitive neuroscience view of schizophrenic thought disorder. *Schizophr Bull* 1997; 23:29-50
- Spitzer M: *The Mind Within the Net*. Cambridge, MA, The MIT Press, 1999
- Spitzer M, Maher BA, Eds. *Philosophy and Psychopathology*. New York, Springer-Verlag, 1990
- Spitzer M, Uehlein F, Oepen G, editors: *Psychopathology and Philosophy*. New York, Springer-Verlag, 1988
- Spitzer RL: On pseudoscience in science, logic in remission, and psychiatric diagnosis: a critique of Rosenhan's "On being sane in insane places". *J Abnorm Psychol* 1975; 84:442-452
- Spitzer RL: The diagnostic status of homosexuality in DSM-III: a reformulation of the issues. *Am J Psychiatry* 1981; 138:210-215
- Spitzer RL: Nonmedical myths and the DSM-III. *APA Monitor* 1981; 3, 33
- Spitzer RL: DSM-III and the politics-science dichotomy syndrome: A response to Thomas E. Schacht's DSM-III and the politics of truth. *American Psychologist* 1985; 40:522-526
- Spitzer RL: An outsider-insider's views about revising the DSMs. *J Abnorm Psychol* 1991; 100:294-296
- Spitzer RL: Diagnosis and need for treatment are not the same. *Arch Gen Psychiatry* 1998; 55:120
- Spitzer RL: Harmful dysfunction and the DSM definition of mental disorder. *J Abnorm Psychol* 1999; 108:430-432
- Spitzer RL: Values and assumptions in the development of DSM-III and DSM-III-R: an insider's perspective and a belated response to Sadler, Hulgus, and Agich's "On values in recent American psychiatric classification". *J Nerv Ment Dis* 2001; 189:351-359
- Spitzer RL, First M, Tucker G: Organic mental disorders and DSM-IV. *Am J Psychiatry* 1991 148:396-397
- Spitzer RL, Williams JB: Dehumanizing descriptors? *Am J Psychiatry* 1979; 136:1481
- Spitzer RL, Williams JB: Having a dream. A research strategy for DSM-IV. *Arch Gen Psychiatry* 1988; 45:871-874
- Stanghellini G: Vulnerability to schizophrenia and lack of common sense. *Schizophrenia Bulletin* 2000; 26:775-787
- Stanghellini G: Psychopathology of common sense. *Philosophy, Psychiatry, & Psychology* 2001; 8:201-218
- Stanghellini G: *Disembodied spirits and deanimated bodies: the psychopathology of common sense*. Oxford: Oxford University Press, 2004.
- Stein DJ: Philosophy and the DSM-III. *Compr Psychiatry* 1991; 32:404-415
- Stein DJ: The philosophy of psychopathy. *Perspect Biol Med* 1996; 39:569-580
- Stephens GL, Graham G: *When self-consciousness breaks: Alien voices and inserted thoughts*. Cambridge, MA: MIT Press, 2000.

- Szasz TS: Second commentary on "Aristotle's function argument". *Philosophy, Psychiatry, & Psychology* 2000; 7:3-16
- Szasz TS, Kety SS, Pribram KH, Schacht TE, Spitzer RL: Philosophical issues of the biological approach, in *The restoration of dialogue: Readings in the philosophy of clinical psychology*. Edited by Miller RB. Washington, DC, American Psychological Association, 1992, pp 171-237
- Tighe JA: The legal art of psychiatric diagnosis: Searching for reliability, in *Framing Disease: Studies in Cultural History*. Edited by Rosenberg CE, Golden J. New Brunswick, NJ, Rutgers University Press, 1992, pp 206-228
- Tischler GL: *Diagnosis and Classification in Psychiatry: A Critical Appraisal of DSM-III*. Cambridge, Cambridge University Press, 1987
- Toulmin S: Concepts of function and mechanism in medicine and medical science, in *Evaluation and Explanation in the Biomedical Sciences*. Edited by Engelhardt HT Jr, Spicker SF. Dordrecht, D. Reidel Publishing Company, 1975, pp 51-66
- Toulmin S: Mental health. *Journal of Medicine and Philosophy* 1977; 2:191-304
- Tsuang MT: From DSM-III-R to DSM-IV: some reflections on process and method. *Harv Rev Psychiatry* 1993; 1: 126-128
- Tsuang MT: Defining alternative phenotypes for genetic studies: what can we learn from studies of schizophrenia? *Am J Med Genet* 2001; 105:8-10
- Tsuang MT, Faraone SV: Genetic heterogeneity of schizophrenia. *Seishin Shinkeigaku Zasshi* 1995; 97:485-501
- Tsuang MT, Lyons MJ, Faraone SV: Clinical phenotypes: Problems in diagnosis, in *Genetic Research in Psychiatry*. Edited by Mendlewicz J, Hippus H, Bondy B, Ackenheil M, Sandler M. New York, Springer-Verlag, 1992, pp 173-192
- Tsuang MT, Stone WS, Gamma F, Faraone SV: Schizotaxia: current status and future directions. *Curr Psychiatry Rep* 2003; 5:128-134
- Turner RP, Lukoff D, Barnhouse RT, Lu FG: Religious or spiritual problem. A culturally sensitive diagnostic category in the DSM-IV. *J Nerv Ment Dis* 1995; 183:435-444
- Wakefield JC: Sex bias in the diagnosis of primary orgasmic dysfunction. *Am Psychol* 1987; 42:464-471
- Wakefield JC: The concept of mental disorder. On the boundary between biological facts and social values. *Am Psychol* 1992; 47: 373-388
- Wakefield JC: Disorder as harmful dysfunction: a conceptual critique of DSM-III-R's definition of mental disorder. *Psychol Rev* 1992; 99:232-247
- Wakefield JC: Disorder as harmful dysfunction: A conceptual critique of DSM-III--R's definition of mental disorder. *Psychological Review* 1992; 99:232-247
- Wakefield JC: Limits of operationalization: a critique of Spitzer and Endicott's (1978) proposed operational criteria for mental disorder. *J Abnorm Psychol* 1993; 102:160-172
- Wakefield JC: Diagnosing DSM-IV--Part I: DSM-IV and the concept of disorder. *Behav Res Ther* 1997; 35:633-649
- Wakefield JC: Diagnosing DSM-IV--Part II: Eysenck (1986) and the essentialist fallacy. *Behav Res Ther* 1997; 35: 651-665
- Wakefield JC: The DSM's theory-neutral nosology is scientifically progressive: response to Follette and Houts (1996). *J Consult Clin Psychol* 1998; 66:846-852
- Wakefield JC: The concept of disorder as a foundation for the DSM's theory-neutral nosology: Response to Follette and Houts: Part II. *Behaviour Research & Therapy* 1999; 37:1001-1027
- Wakefield JC: Evolutionary versus prototype analyses of the concept of disorder. *J Abnorm Psychol* 1999; 108:374-399



- Wakefield JC: Mental disorder as a black box essentialist concept. *J Abnorm Psychol* 1999; 108:465-472
- Wakefield JC: Philosophy of science and the progressiveness of the DSM's theory-neutral nosology: Response to Follette and Houts: Part I. *Behaviour Research & Therapy* 1999; 37:963-999
- Wakefield JC: Spandrels, vestigial organs, and such: Reply to Murphy and Woolfolk's "The harmful dysfunction analysis of mental disorder." *Philosophy, Psychiatry, & Psychology* 2000; 7:253-269
- Wakefield JC: The myth of DSM's invention of new categories of disorder: Houts's diagnostic discontinuity thesis disconfirmed. *Behav Res Ther* 2001; 39:575-624
- Wakefield JC, Pottick KJ, Kirk SA: Should the DSM-IV diagnostic criteria for conduct disorder consider social context? *Am J Psychiatry* 2002; 159: 380-386
- Wakefield JC, Spitzer RL: Why requiring clinical significance does not solve epidemiology's and DSM's validity problem: Response to Regier and Narrow, in *Defining psychopathology in the 21st century: DSM-V and beyond*. American Psychopathological Association series. Edited by Helzer JE, Hudziak JJ. Washington, DC, American Psychiatric Publishing, Inc, 2002, pp 31-40
- Wallace ER, Radden JH, Sadler JZ: The philosophy of psychiatry--who needs it? *Journal of Nervous & Mental Disease* 1997; 185:67-73
- Wallace ER: Psychiatry's sickness and its biological cure. *Psychiatry* 1997; 60:89-99
- Widiger TA: Categorical versus dimensional classification: Implications from and for research. *Journal of Personality Disorders* 1992; 6:287-300
- Widiger TA: The construct of mental disorder. *Clinical Psychology-Science & Practice* 1997; 4:262-266
- Widiger TA: Gender bias in the diagnosis of personality disorders. *Harv Ment Health Lett* 2000; 16:5-7
- Widiger TA: Plate tectonics in the classification of personality disorder: shifting to a dimensional model. *Am Psychol* 2007; 62: 71-83.
- Widiger TA, Frances AJ, Pincus HA, Davis WW, First MB: Toward an empirical classification for the DSM-IV. *Journal of Abnormal Psychology* 1991; 100:280-288
- Widiger TA, Hurt SW, Frances A, Clarkin JF, Gilmore M: Diagnostic efficiency and DSM-III. *Arch Gen Psychiatry* 1984; 41: 1005-1012
- Widiger TA, Spitzer RL: Criticisms of DSM-III-R. *Am J Psychiatry* 1989; 146:566-567
- Widiger TA, Spitzer RL: Sex bias in the diagnosis of personality disorders: Conceptual and methodological issues. *Clinical Psychology Review* 1991; 11:1-22
- Widiger TA, Trull TJ: The scholarly development of DSM-IV, in *International Review of Psychiatry, Volume 1*. Edited by Costa e Silva JA, Nadelson C. Washington, DC, American Psychiatric Press, 1993
- Williams JB, Spitzer RL: The issue of sex bias in DSM-III. A critique of A Woman's View of DSM-III by Marcie Kaplan. *Am Psychol* 1983; 38:793-798
- Zachar P: Folk taxonomies should not have essences, either: A response to the commentary. *Philosophy, Psychiatry, & Psychology* 2000; 7:191-194
- Zachar P: Psychiatric disorders are not natural kinds. *Philosophy, Psychiatry, & Psychology* 2000; 7:167-182
- Zachar P: *Psychological Concepts and Biological Psychiatry: A Philosophical Analysis*. Amsterdam, J. Benjamins, 2000
- Zahavi D: *Exploring the self: Philosophical and psychopathological perspectives on self-experience*. Amsterdam: John Benjamins, 2000.
- Zimmerman M: Why are we rushing to publish DSM-IV? *Archives of General Psychiatry* 1988; 45:1135-1138
- Zimmerman M: Is DSM-IV needed at all? *Archives of General Psychiatry* 1990; 47:974-976

Zimmerman M, Jampala VC, Sierles FS, Taylor MA: DSM-IV: a nosology sold before its time? *Am J Psychiatry* 1991; 148:463-467

Zubin J: Classification of the Behavior Disorders. *Annual Review of Psychology* 1967; 18:373-406

Zubin J: But is it good for science? *Clinical Psychologist* 1977; 31:1, 5-7
